# Supplementary material for: Microbiota Analysis and Microbiological Hazard Assessment in Chinese Chive (Allium tuberosum Rottler) Depending on Retail Types
Source: PubMed Central journal article supplement (PMC9628847; doi:10.4014/jmb.2112.12013), 2021-12-23
Supplement: jmb-32-2-195-supple.pdf [file jmb-32-2-195-supple.pdf]

**Supplement table 1. PCR primers information used in this study.**

| Target bacteria                           | Target gene                        | Primer sequence (5' → 3')                                   | References |
|-------------------------------------------|------------------------------------|-------------------------------------------------------------|------------|
| <i>Acinetobacter lwoffii</i>              | <i>bla</i> <sub>OXA-134-like</sub> | F : CAGGAAGTACAACGCATCCA<br>R : TGCTGGACTTGAGGATCAAA        | [1]        |
| <i>Klebsiella pneumoniae</i>              | Internal transcribed spacer region | F : ATTTGAAGAGGTTGCAAACGAT<br>R : CCGAAGATGTTTCACTTCTGATT   | [2]        |
| <i>Staphylococcus aureus</i>              | Sa442                              | F : GTCGGGTACACGATATTCTTCACG<br>R : CTCGTATGACCAGCTTCGGT    | [3]        |
| <i>Serratia marcescens</i>                | <i>luxS</i>                        | F : TGCCTGGAAAGCGGCGATGG<br>R : CGCCAGCTCGTCGTTGTGGT        | [4]        |
| Enterohemorrhagic <i>Escherichia coli</i> | <i>stx1</i>                        | F : GTCACAGTAACAAACCGTAACA<br>R : TCGTTGACTACTTCTTATCTGGA   | [5]        |
| Enterotoxigenic <i>Escherichia coli</i>   | <i>st</i>                          | F : TTTCCCCTCTTTTAGTCAGTCAA<br>R : GCAGGATTACAACAATTACAGCAG | [6]        |
| Enteropathogenic <i>Escherichia coli</i>  | <i>eaeA</i>                        | F : ATGCTTAGTGCTGGTTTAGG<br>R : GCCTTCATCATTTCGCTTTC        | [7]        |
| Total bacteria                            | 16s rRNA V5-V6                     | F : CMGGATTAGATACCCCKGGT<br>R : GGGTTGCGCTCGTTGC            | [8]        |

## References

1. Kamolvit W, Higgins PG, Paterson DL, Seifert H. 2014. Multiplex PCR to detect the genes encoding naturally occurring oxacillinases in *Acinetobacter* spp. *J. Antimicrob. Chemother.* **69**: 959-963.
2. Liu Y, Liu C, Zheng W, Zhang X, Yu J, Gao Q, *et al.* 2008. PCR detection of *Klebsiella pneumoniae* in infant formula based on 16S–23S internal transcribed spacer. *Int. J. Food Microbiol.* **125**: 230-235.
3. Reischl U, Linde H-Jr, Metz M, Leppmeier B, Lehn N. 2000. Rapid identification of methicillin-resistant *Staphylococcus aureus* and simultaneous species confirmation using real-time fluorescence PCR. *J. Clin. Microbiol.* **38**: 2429-2433.
4. Salamon D, Gosiewski T, Krawczyk A, Sroka-Oleksiak A, Duplaga M, Fyderek K, *et al.* 2020. Quantitative changes in selected bacteria in the stool during the treatment of Crohn's disease. *Adv Med Sci.* **65**: 348-353.
5. Jothikumar N, Griffiths MW. 2002. Rapid detection of *Escherichia coli* O157: H7 with multiplex real-time PCR assays. *Appl. Environ. Microbiol.* **68**: 3169-3171.
6. Chukwu MO, Abia ALK, Ubomba-Jaswa E, Obi LC, Dewar JB. 2019. Antibiotic resistance profile and clonality of *E. coli* isolated from water and paediatric stool samples in the north-west, province South Africa. *J. Pure Appl. Microbiol.* **13**: 517-530.
7. Vahedi A, Soltan Dallal MM, Douraghi M, Nikkhahi F, Rajabi Z, Yousefi M, *et al.* 2018. Isolation and identification of specific bacteriophage against enteropathogenic *Escherichia coli* (EPEC) and in vitro and in vivo characterization of bacteriophage. *FEMS Microbiol. Lett.* **365**: fny136.
8. Yu Y-C, Yum S-J, Jeon D-Y, Jeong H-G. 2018. Analysis of the microbiota on lettuce (*Lactuca sativa* L.) cultivated in South Korea to identify foodborne pathogens. *J. Microbiol. Biotechnol.* **28**: 1318-1331.
